# Supplementary material
Source: PubMed Central journal article supplement (PMC2981661)

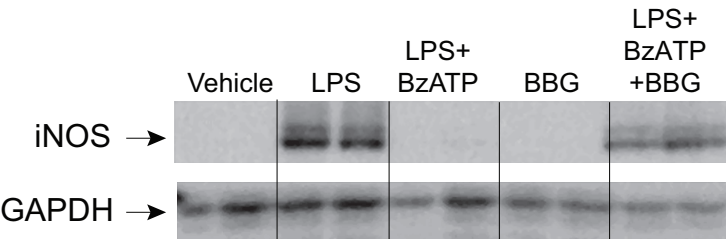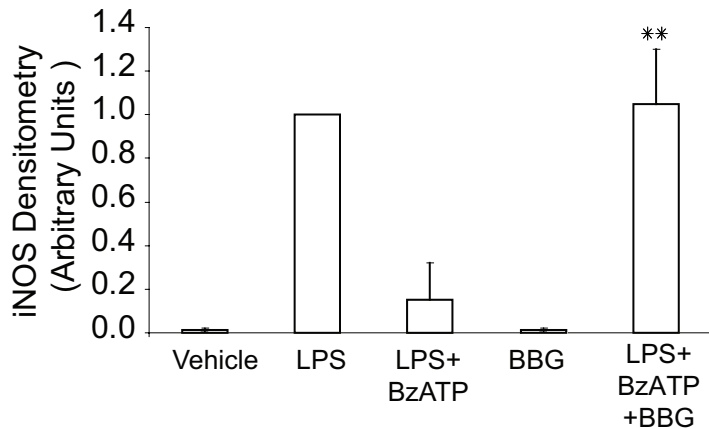

Supplement: NIHMS228326-supplement-Supp_Fig_s1.pdf [file NIHMS228326-supplement-Supp_Fig_s1.pdf]

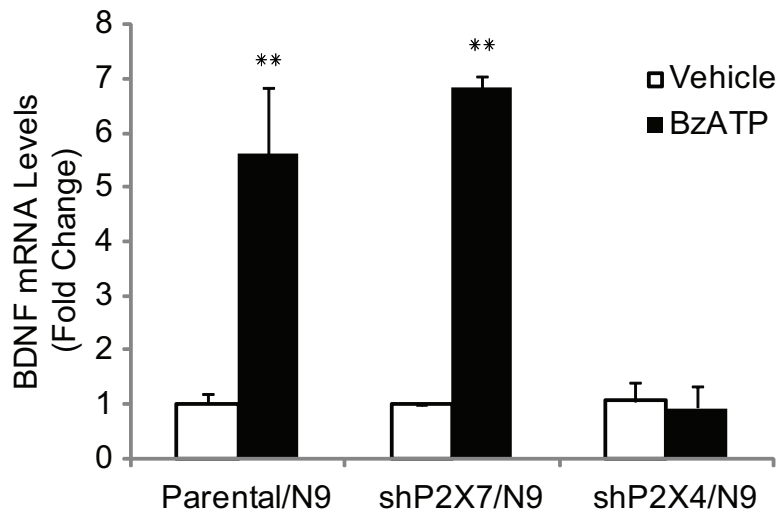

Supplement: NIHMS228326-supplement-Supp_Fig_s2.pdf [file NIHMS228326-supplement-Supp_Fig_s2.pdf]
